# Supplementary material for: An Electrochemical and Raman Scattering Dual Detection Biosensor for Rapid Screening and Biomolecular Profiling of Cancer Biomarkers
Source: MDPI journal article supplement (doi:10.3390/chemosensors10030093), 2022-02-28
Supplement: s1 [file s1]

Archive with 1 entries (1 files):
- chemosensors-1599399-supplementary.pdf
