# Supplementary material for: An Electrochemical and Raman Scattering Dual Detection Biosensor for Rapid Screening and Biomolecular Profiling of Cancer Biomarkers
Source: MDPI journal article supplement (doi:10.3390/chemosensors10030093), 2022-02-28
Supplement: s1 [file s1 › chemosensors-1599399-supplementary.pdf]

# An Electrochemical and Raman Scattering Dual Detection Biosensor for Rapid Screening and Biomolecular Profiling of Cancer Biomarkers

Shuvashis Dey <sup>1</sup>, Emtiaz Ahmed <sup>1</sup>, Pranjal Satishchandra Somvanshi <sup>1</sup>, Abu A. I. Sina <sup>1,\*</sup>, Alain Wuethrich <sup>1,\*</sup> and Matt Trau <sup>1,2,\*</sup>

<sup>1</sup> Centre for Personalized Nanomedicine, Australian Institute for Bioengineering and Nanotechnology (AIBN), The University of Queensland, Brisbane, QLD 4072, Australia; s.dey@uq.edu.au (S.D.); e.ahmed@uq.edu.au (E.A.); p.somvanshi@uq.net.au (P.S.S.)

<sup>2</sup> School of Chemistry and Molecular Biosciences, The University of Queensland, Brisbane, QLD 4072, Australia

\* Correspondence: a.sina@uq.edu.au (A.A.I.S.); a.wuethrich@uq.edu.au (A.W.); m.trau@uq.edu.au (M.T.)

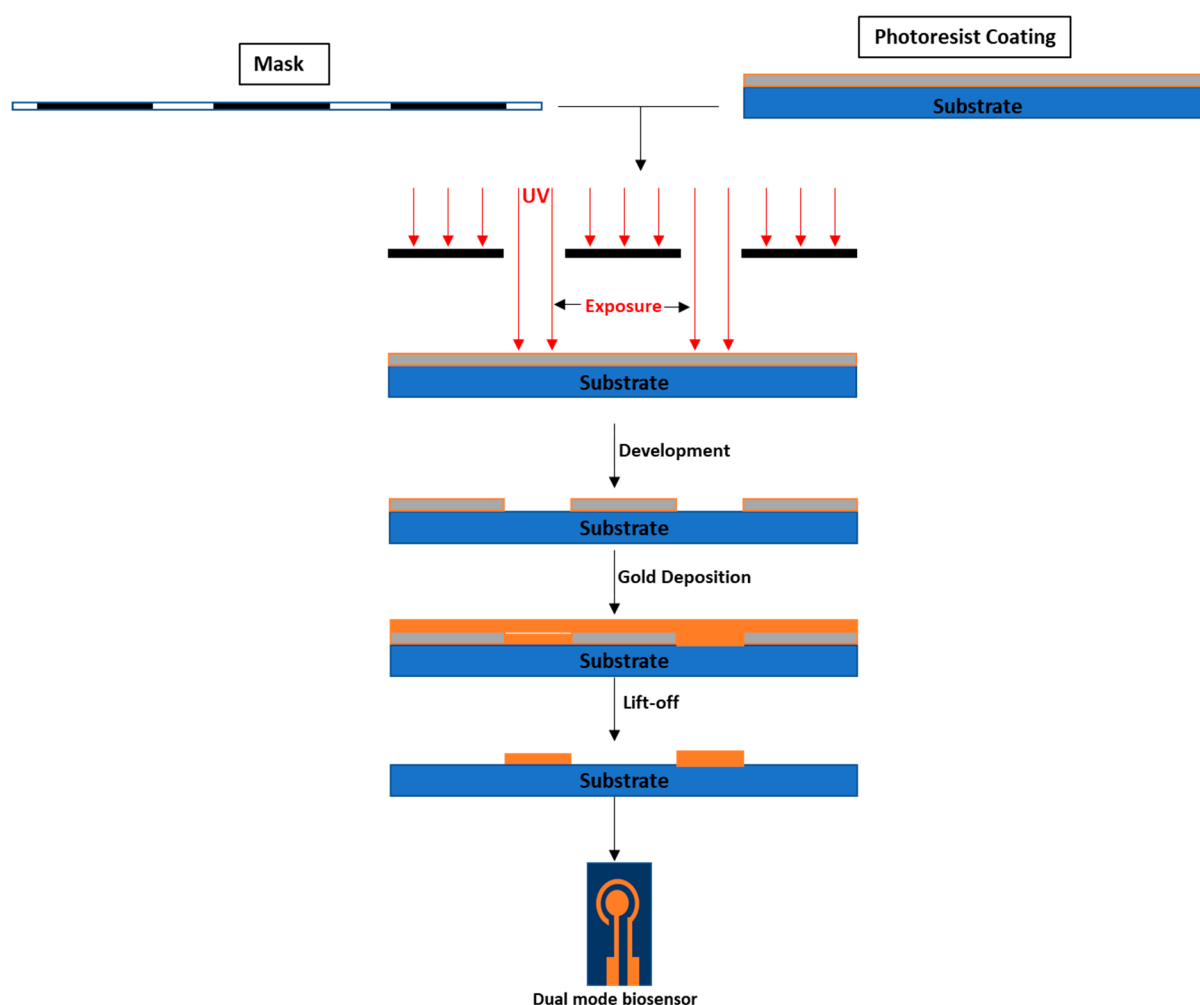

Figure S1. Schematic of biosensor fabrications.

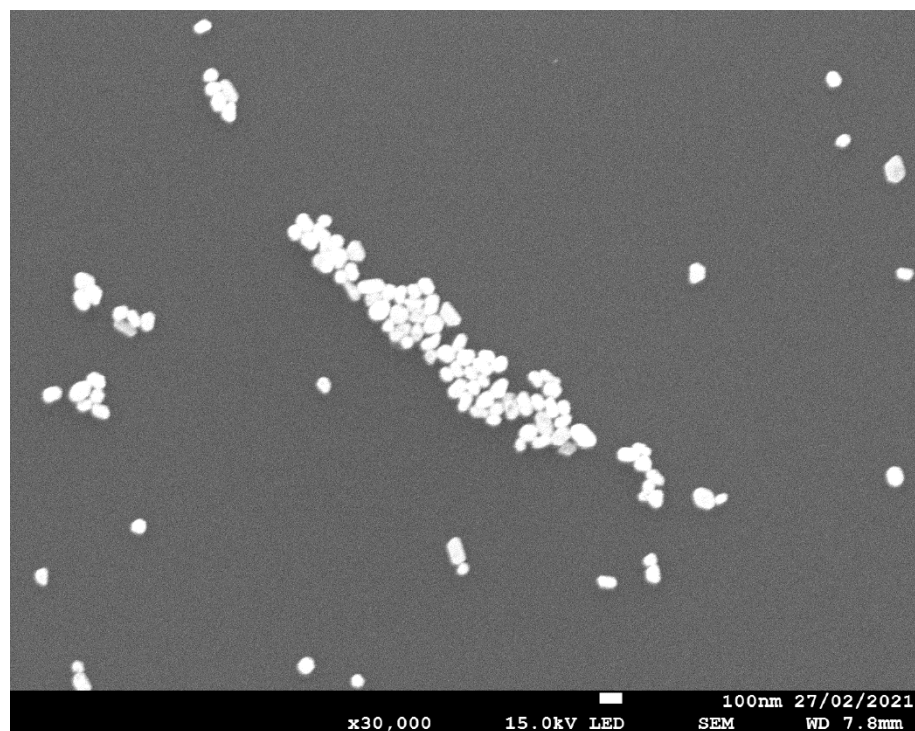

**Figure S2.** SEM image of synthesised gold nanoparticles.

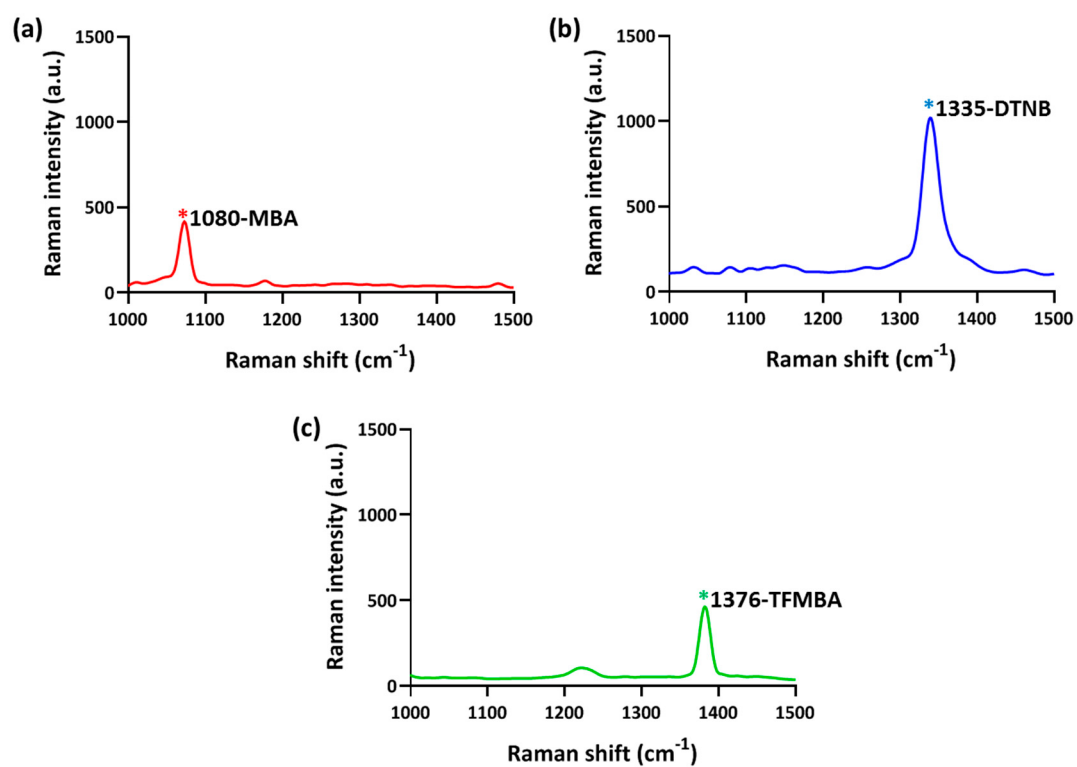

**Figure S3.** Raman signals of SERS nanotags. Characteristic Raman signal of: (a) MBA-BRAF SERS nanotags at 1080  $\text{cm}^{-1}$ ; (b) EGFR-DTNB SERS nanotags at 1335  $\text{cm}^{-1}$  and (c) PDL-1-TFMBA at 1376  $\text{cm}^{-1}$ .

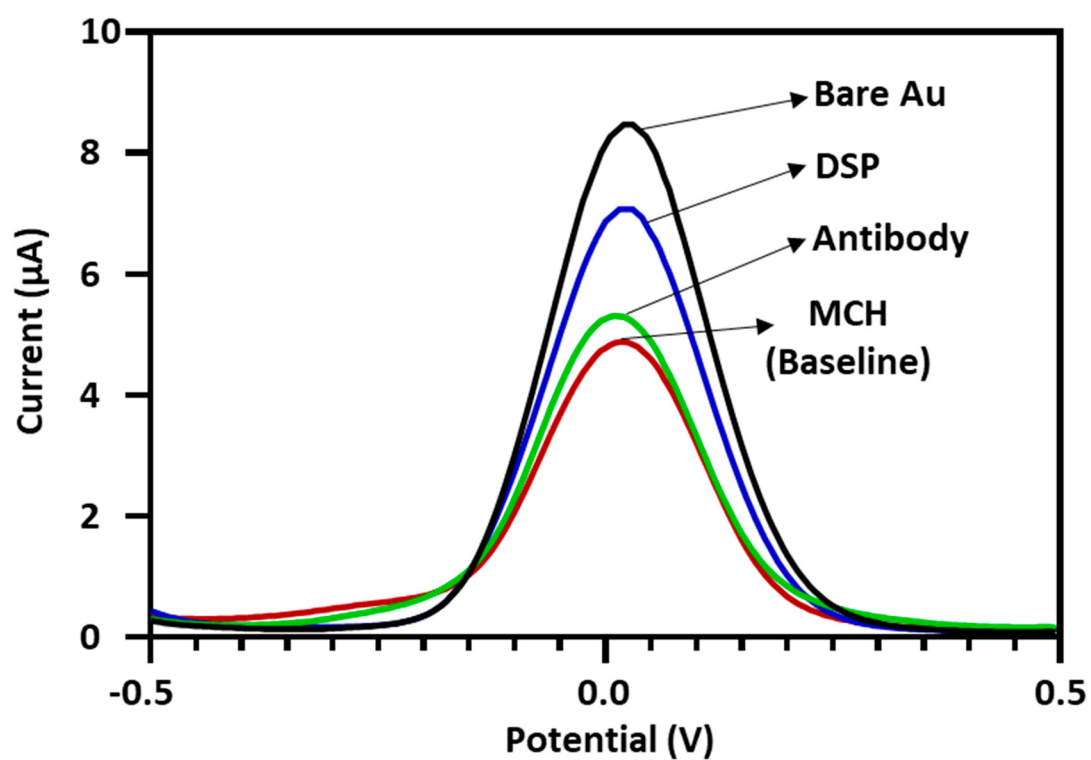

**Figure S4.** DPV signals during biosensor functionalization. Successful immobilization of molecules on the biosensor surface is confirmed by current reduction as bare Au (gold) > DSP functionalization > Antibody functionalization > MCH blocking (baseline for target biomolecule analysis).
